# Supplementary material
Source: publisher figshare collection journal article supplement (https://acs.figshare.com/ndownloader/files/3987982)
Supplement: Supplementary file 1 [file 3987982]

**Supporting Information:**

# Pressure-induced Reverse Reaction of the Photochemical Decomposition of Germanium Tetraiodide Molecular Crystal

*Yuhang Deng<sup>1</sup>, Zhilei Sui<sup>1</sup>, Junbo Gong<sup>1</sup>, Rucheng Dai<sup>2</sup>, Zhongping Wang<sup>2</sup>, Zengming Zhang<sup>2\*</sup>, Zejun Ding<sup>1</sup>*

<sup>1</sup>Hefei National Laboratory for Physical Sciences at Microscale and Department of Physics, Hefei, Anhui 230026, P. R. China

<sup>2</sup>The Center of Physical Experiments, University of Science and Technology of China, Hefei, Anhui 230026, P. R. China

Corresponding Author: Prof. Zengming Zhang; Email: zzm@ustc.edu.cn

## 1. High pressure apparatus

The diameter of culet of our used diamond anvil cell (DAC) is 600  $\mu\text{m}$ . The gasket which is used to protect the DAC and keep the high pressure environment is made from T301 stainless steel. After loading  $\text{GeI}_4$  sample into the gasket hole drilled by MH20M spark eroder (BETSA), we pressed the sample with a press similar to the NBS type. Generally, pressure was increased gradually, followed by a relaxation time lasting for about 10 minutes.

## 2. Sealing $\text{GeI}_4$ in cyclohexane solution

Firstly,  $10^{-2}$  mol/L  $\text{GeI}_4$  in cyclohexane solution was prepared; then one end of the glass capillary with diameter 0.9-1.1 mm was immersed into the solution. After absorbing the solution, both two ends of the capillary were clogged by plasticine. Raman spectra excited by different lasers were collected from the liquid column in the capillary.
